# Supplementary material
Source: publisher figshare collection journal article supplement (https://tandf.figshare.com/ndownloader/files/12847265)
Supplement: Supplementary file 1 [file 12847265]

**Supplementary data**

Measured parameters in subsamples collected from control bottles after each ozonation period was accomplished.

| **Time (min)** | **DOC (mg/L)** | **TDN (mg/L)** | **NH4-N (mg/L)** | **NO2-N (mg/L)** | **C (µg/g)** | **N (µg/g)** |
| --- | --- | --- | --- | --- | --- | --- |
| 0 | 73.90 | 28.73 | 1.80 | 14.98 | 30.00 | 4.87 |
| 10 | 74.30 | 28.44 | 1.67 | 18.26 | 29.36 | 4.41 |
| 20 | 74.42 | 30.62 | 1.93 | 16.03 | 31.43 | 4.86 |
| 30 | 73.62 | 28.60 | 1.67 | 16.69 | 31.35 | 4.73 |
| 40 | 77.45 | 26.05 | 1.55 | 15.51 | 31.49 | 4.57 |
| 50 | 76.19 | 24.86 | 1.42 | 14.91 | 31.36 | 4.91 |
| 60 | 74.13 | 23.34 | 1.42 | 15.18 | 32.76 | 5.27 |
| Mean | 74.86 | 27.24 | 1.64 | 15.94 | 31.11 | 4.80 |
| SD | 1.31 | 2.37 | 0.18 | 1.12 | 1.03 | 0.25 |
